# Supplementary material for: Inferring the role of the microbiome on survival in patients treated with immune checkpoint inhibitors: causal modeling, timing, and classes of concomitant medications
Source: Springer Nature journal article supplement (doi:10.1186/s12885-020-06882-6), 2020-05-06

1 **Figure S1: Causal Model with references**

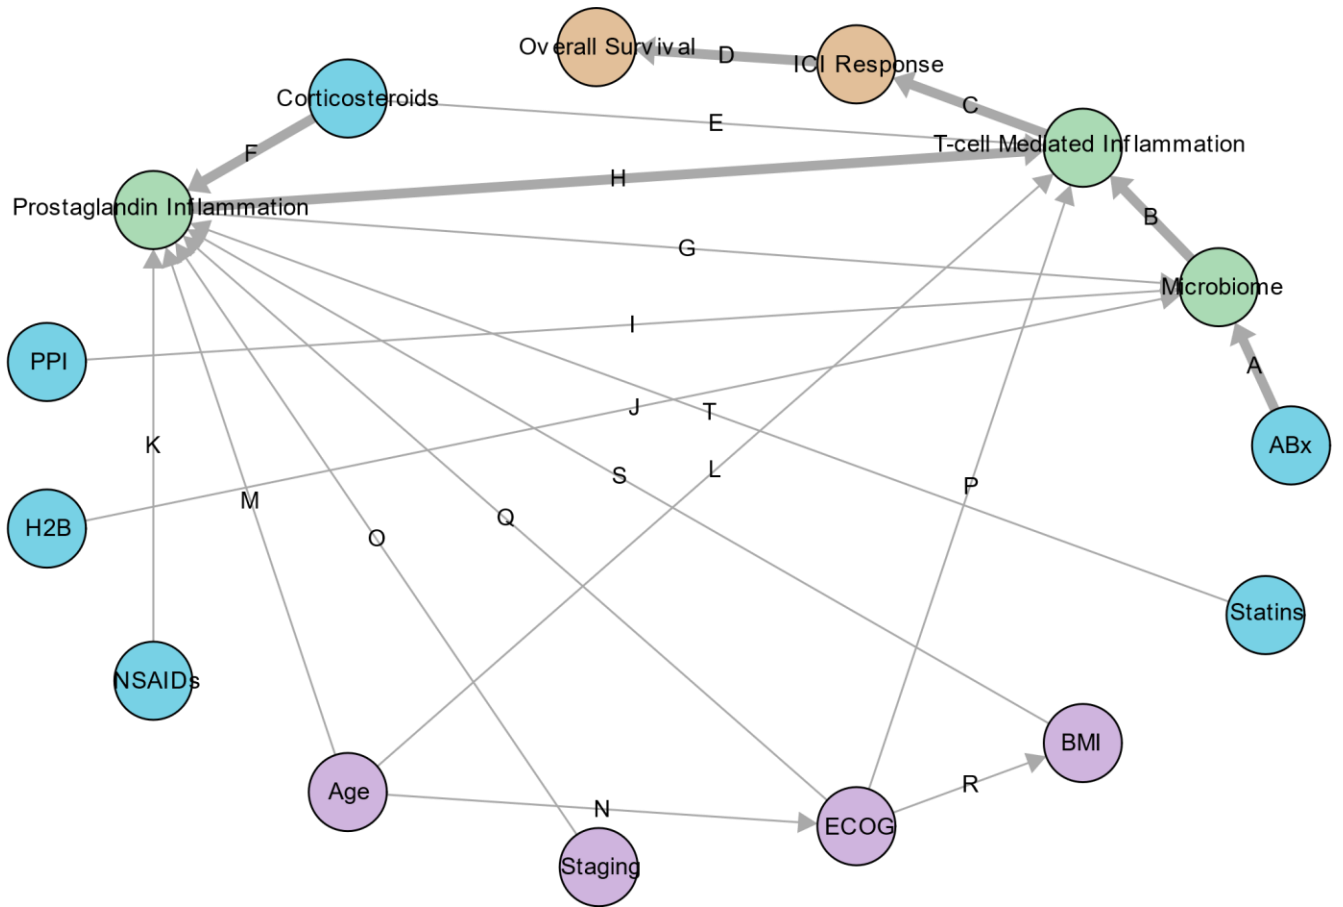

2

3 **Table of references for each link:**

| Edge Label | Interaction                                               | References |
|------------|-----------------------------------------------------------|------------|
| A          | ABx > Microbiome                                          | 1-4        |
| B          | Microbiome > T-cell Mediated Inflammation                 | 1,4,5      |
| C          | T –Cell Mediated Inflammation > ICI response              | 6          |
| D          | ICI response > OS                                         | 1,4,5      |
| E          | CS >T-Cell Mediated Inflammation                          | 7          |
| F          | CS > Prostaglandin Inflammation                           | 7          |
| G          | Prostaglandin Inflammation > Microbiome                   | 8          |
| H          | Prostaglandin Inflammation > T-Cell Mediated Inflammation | 9          |
| I          | PPI > Microbiome                                          | 10-13      |
| J          | H2B > Microbiome                                          | 13         |
| K          | NSAID > Prostaglandin Inflammation                        | 9          |
| L          | Age > T-Cell Mediated Inflammation                        | 14         |
| M          | Age > Prostaglandin Inflammation                          | 15         |
| N          | Age > ECOG                                                | 16         |
| O          | Staging > Prostaglandin Inflammation                      | 9          |
| P          | ECOG > T-Cell Mediated Inflammation                       | 17         |

|   |                                      |       |
|---|--------------------------------------|-------|
| Q | ECOG > Prostaglandin Inflammation    | 17,18 |
| R | ECOG > BMI                           | 19    |
| S | ECOG > Prostaglandin Inflammation    | 18    |
| T | Statins > Prostaglandin Inflammation | 20    |

4

5 Reference key:

- 6 1. Routy B, Le Chatelier E, Derosa L, Duong CP, Alou MT, Daillère R, et al. Gut microbiome influences  
7 efficacy of PD-1–based immunotherapy against epithelial tumors. *Science*. 2018;359(6371):91–97.
- 8 2. Dethlefsen L, Relman DA. Incomplete recovery and individualized responses of the human distal gut  
9 microbiota to repeated antibiotic perturbation. *Proceedings of the National Academy of Sciences*.  
10 2011 Mar 15;108(Supplement\_1):4554–61.
- 11 3. Boursi B, Mamtani R, Haynes K, Yang Y-X. Recurrent antibiotic exposure may promote cancer  
12 formation – Another step in understanding the role of the human microbiota? *European Journal of*  
13 *Cancer*. 2015 Nov;51(17):2655–64.
- 14 4. Matson V, Fessler J, Bao R, Chongsuwat T, Zha Y, Alegre M-L, et al. The commensal microbiome is  
15 associated with anti–PD-1 efficacy in metastatic melanoma patients. *Science*. 2018 Jan  
16 5;359(6371):104–8.
- 17 5. Gopalakrishnan V, Spencer CN, Nezi L, Reuben A, Andrews MC, Karpinets TV, et al. Gut microbiome  
18 modulates response to anti–PD-1 immunotherapy in melanoma patients. *Science*. 2018 Jan  
19 5;359(6371):97–103.
- 20 6. Chheda ZS, Sharma RK, Jala VR, Luster AD, Haribabu B. Chemoattractant Receptors BLT1 and CXCR3  
21 Regulate Antitumor Immunity by Facilitating CD8<sup>+</sup> T Cell Migration into Tumors. *Ji*. 2016 Sep  
22 1;197(5):2016–26.
- 23 7. Arbour KC, Mezquita L, Long N, Rizvi H, Auclin E, Ni A, et al. Impact of Baseline Steroids on Efficacy  
24 of Programmed Cell Death-1 and Programmed Death-Ligand 1 Blockade in Patients With Non–Small-  
25 Cell Lung Cancer. *JCO*. 2018 Oct;36(28):2872–8.
- 26 8. Wu T, Yang L, Jiang J, Ni Y, Zhu J, Zheng X, et al. Chronic glucocorticoid treatment induced circadian  
27 clock disorder leads to lipid metabolism and gut microbiota alterations in rats. *Life Sciences*. 2018  
28 Jan;192:173–82.
- 29 9. Hussain M, Javeed A, Ashraf M, Al-Zubair N, Stewart A, Mukhtar MM. Non-steroidal anti-  
30 inflammatory drugs, tumour immunity and immunotherapy. *Pharmacological Research*. 2012  
31 Jul;66(1):7–18.
- 32 10. Maier L, Pruteanu M, Kuhn M, Zeller G, Telzerow A, Anderson EE, et al. Extensive impact of non-  
33 antibiotic drugs on human gut bacteria. *Nature*. 2018 Mar;555(7698):623–8.
- 34 11. Imhann F, Bonder MJ, Vich Vila A, Fu J, Mujagic Z, Vork L, et al. Proton pump inhibitors affect the gut  
35 microbiome. *Gut*. 2016 May;65(5):740–8.

- 36 12. Jackson MA, Goodrich JK, Maxan M-E, Freedberg DE, Abrams JA, Poole AC, et al. Proton pump  
37 inhibitors alter the composition of the gut microbiota. *Gut*. 2016 May;65(5):749–56.
- 38 13. Rogers MAM, Aronoff DM. The influence of non-steroidal anti-inflammatory drugs on the gut  
39 microbiome. *Clinical Microbiology and Infection*. 2016 Feb 1;22(2):178.e1-178.e9.
- 40 14. Fülöp T, Larbi A, Pawelec G. Human T Cell Aging and the Impact of Persistent Viral Infections. *Front*  
41 *Immunol* [Internet]. 2013 Sep 13 [cited 2019 Jul 24];4. Available from:  
42 <https://www.ncbi.nlm.nih.gov/pmc/articles/PMC3772506/>
- 43 15. Goodwin JS, Messner RP. Sensitivity of lymphocytes to prostaglandin E2 increases in subjects over  
44 age 70. *J Clin Invest*. 1979 Aug 1;64(2):434–9.
- 45 16. Hickey ME, Mason SE. Age and gender differences in participation rates, motivators for, and barriers  
46 to exercise. :11.
- 47 17. Pedersen BK, Hoffman-Goetz L. Exercise and the Immune System: Regulation, Integration, and  
48 Adaptation. *Physiological Reviews*. 2000 Jul 1;80(3):1055–81.
- 49 18. Martínez ME, Heddens D, Earnest DL, Bogert CL, Roe D, Einspahr J, et al. Physical Activity, Body  
50 Mass Index, and Prostaglandin E 2 Levels in Rectal Mucosa. *J Natl Cancer Inst*. 1999 Jun  
51 2;91(11):950–3.
- 52 19. Fang J, Wylie-Rosett J, Cohen HW, Kaplan RC, Alderman MH. Exercise, body mass index, caloric  
53 intake, and cardiovascular mortality. *American Journal of Preventive Medicine*. 2003 Nov  
54 1;25(4):283–9.
- 55 20. Levine L. Statins stimulate arachidonic acid release and prostaglandin I2 production in rat liver cells.  
56 *Lipids Health Dis*. 2003 Mar 12;2:1.

57  
58  
59  
60  
61  
62  
63  
64  
65  
66  
67

68 **Figure S2. Number of antibiotics, separated by class, prescribed across all cancers and the frequency**  
 69 **of multiple antibiotics.**

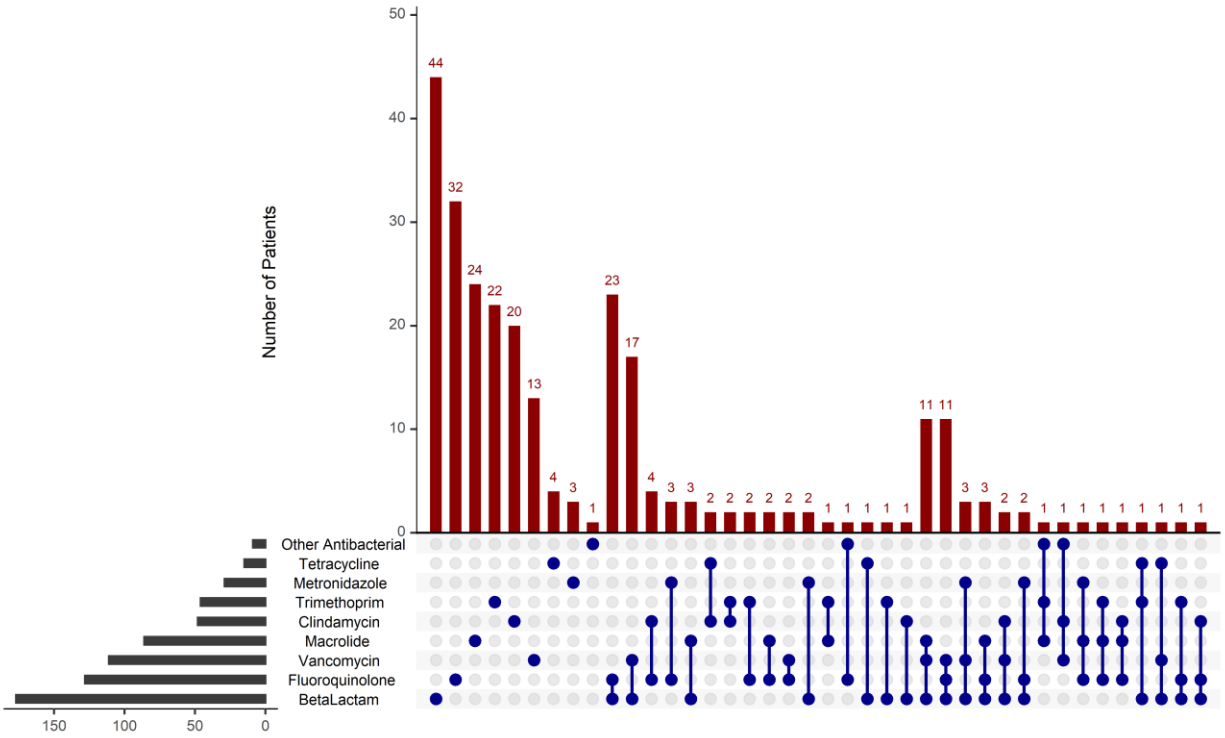

70  
 71  
 72  
 73  
 74  
 75  
 76  
 77  
 78  
 79  
 80  
 81  
 82  
 83

84 Figure S3. Number of corticosteroids, separated by class, prescribed across all cancers and the  
 85 frequency of multiple antibiotics.

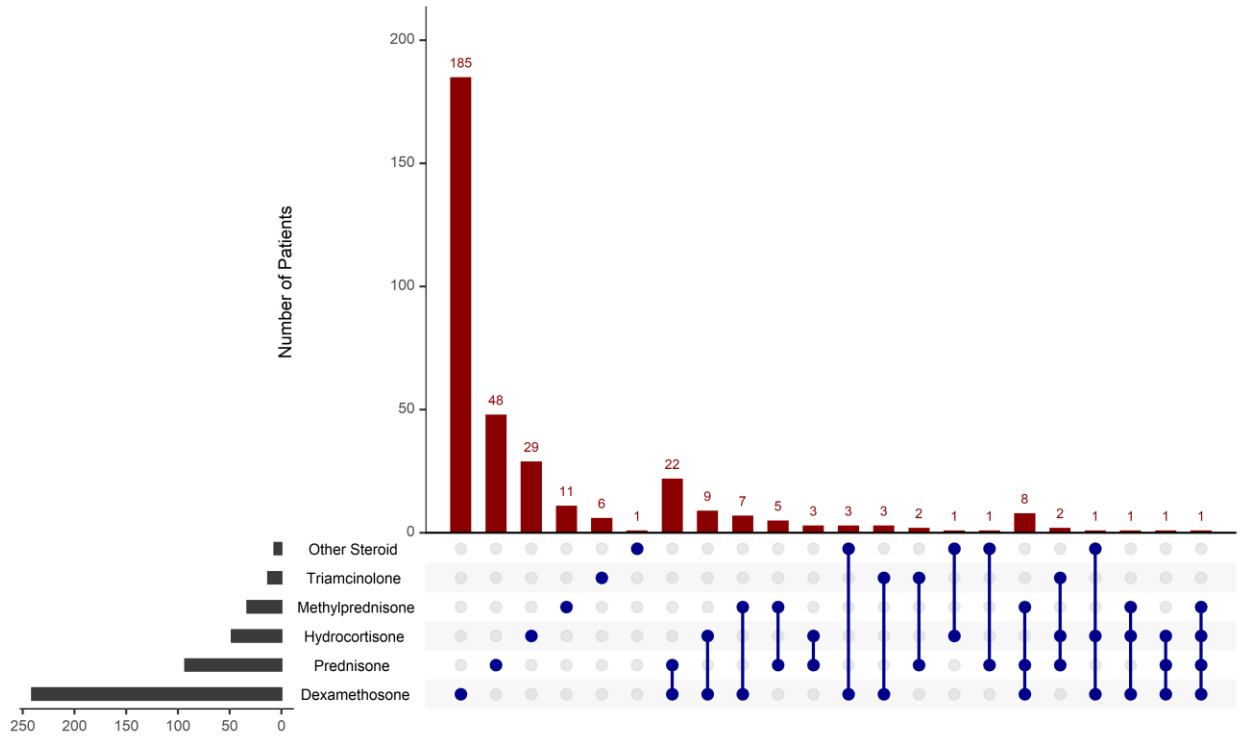

86

**Figure S4. Number of medications prescribed across all cancers and the frequency of multiple medications.**

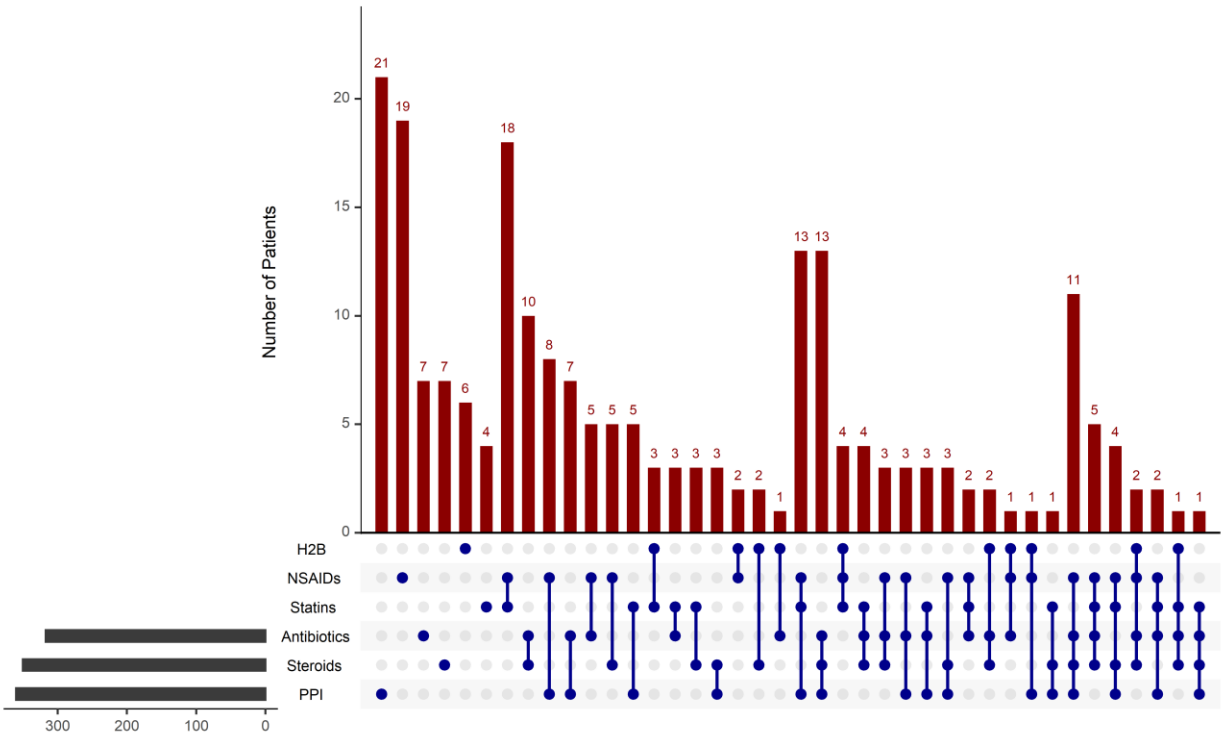

Supplement: MOESM1 [file 17959212]
